# Supplementary material for: Theoretical insights into the mechanism of ferroptosis suppression via inactivation of a lipid peroxide radical by liproxstatin-1
Source: Royal Society of Chemistry journal article supplement (doi:10.1039/c7cp00804j), 2017-01-01
Supplement: c7cp00804j1.pdf [file c7cp00804j1.pdf]

# **Theoretical Insight into the Mechanism of Ferroptosis Suppression via Inactivation of Lipid Peroxide Radical by Liproxstatin-1**

Xiehuang Sheng\*, Chao Shan, Jianbiao Liu, Jintong Yang, Bin Sun, Dezhan Chen\*

College of Chemistry, Chemical Engineering and Materials Science, Collaborative Innovation Center of Functionalized Probes for Chemical Imaging in Universities of Shandong, Key Laboratory of Molecular and Nano Probes, Ministry of Education, Shandong Provincial Key Laboratory of Clean Production of Fine Chemicals, Shandong Normal University, Jinan 250014, P. R. China

## **Table of Contents**

|                                                                         |      |
|-------------------------------------------------------------------------|------|
| ■ Figure S1 Spin density of the 1', 2', 3'-N radicals of liproxstatin-1 | 2    |
| ■ Cartesian Coordinates(Å) of the stationary points                     | 3-29 |

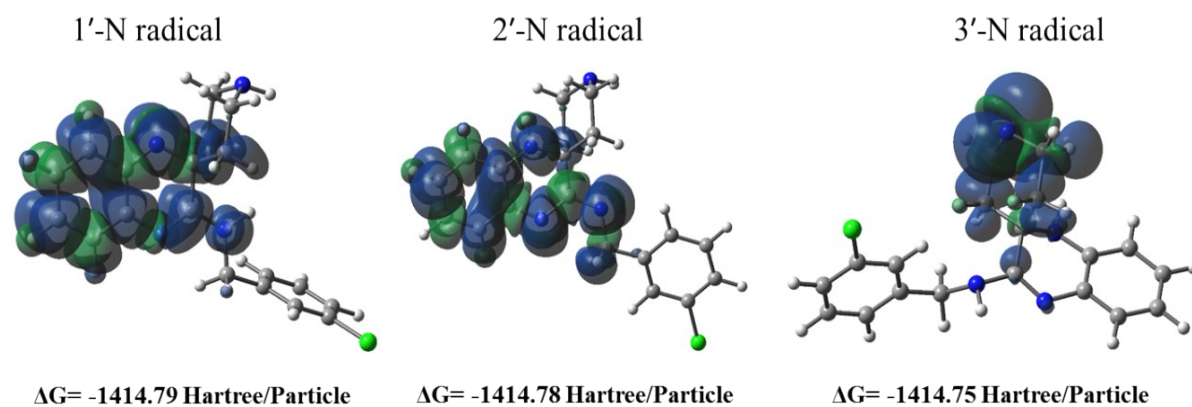

**Figure S1** Spin density of the 1', 2', 3'-N radicals of liproxstatin-1; in blue the  $\alpha$  spin density and in green the  $\beta$  spin density, isovalue = 0.0004

## COORDINATES OF THE STATIONARY POINTS

[Liproxstatin-1]

reactant complex (1'-NH)

|   |          |          |          |
|---|----------|----------|----------|
| C | -4.88871 | -2.08853 | -0.96679 |
| C | -4.40535 | -0.94325 | -0.35973 |
| C | -3.03444 | -0.62936 | -0.4421  |
| C | -2.13459 | -1.5346  | -1.07014 |
| C | -2.65125 | -2.67605 | -1.69473 |
| C | -4.01419 | -2.94457 | -1.65255 |
| H | -5.94741 | -2.31887 | -0.91885 |
| H | -5.06666 | -0.26029 | 0.16145  |
| H | -1.95789 | -3.35554 | -2.17602 |
| H | -4.39972 | -3.83467 | -2.13713 |
| C | -0.32359 | -0.23959 | -0.51391 |
| N | -2.55437 | 0.53186  | 0.0958   |
| H | -2.8669  | 0.76688  | 1.02323  |
| N | -0.76646 | -1.37004 | -0.96706 |
| N | 1.00634  | -0.09207 | -0.31074 |
| C | -1.22707 | 0.97504  | -0.30338 |
| C | -0.71378 | 1.98803  | 0.7352   |
| C | -1.34726 | 1.69899  | -1.67558 |
| C | -1.57529 | 3.25884  | 0.75801  |
| H | 0.30449  | 2.2972   | 0.46848  |
| H | -0.68263 | 1.52565  | 1.72722  |
| C | -2.17592 | 2.98098  | -1.55946 |
| H | -0.33435 | 1.93627  | -2.02749 |
| H | -1.79353 | 1.01448  | -2.40285 |
| H | -1.14677 | 3.97387  | 1.46583  |
| H | -2.57861 | 3.02446  | 1.12452  |
| H | -2.19243 | 3.49811  | -2.52346 |
| H | -3.21234 | 2.72002  | -1.32059 |
| N | -1.7021  | 3.90357  | -0.53969 |
| H | -0.81316 | 4.30616  | -0.81904 |
| H | 1.33435  | 0.72771  | 0.17048  |
| C | 1.94393  | -1.18665 | -0.48619 |

|    |          |          |          |
|----|----------|----------|----------|
| H  | 1.8423   | -1.91574 | 0.32782  |
| H  | 1.671    | -1.71017 | -1.40629 |
| C  | 3.35478  | -0.66219 | -0.55602 |
| C  | 4.25009  | -0.90453 | 0.48605  |
| C  | 3.7787   | 0.08404  | -1.66065 |
| C  | 5.54848  | -0.40566 | 0.413    |
| C  | 5.07705  | 0.57799  | -1.71962 |
| C  | 5.97524  | 0.33702  | -0.68144 |
| H  | 5.40141  | 1.15119  | -2.58152 |
| H  | 6.98969  | 0.71523  | -0.72029 |
| H  | 3.08716  | 0.27106  | -2.47606 |
| H  | 3.94333  | -1.48197 | 1.35142  |
| Cl | 6.65381  | -0.71914 | 1.72099  |
| C  | -3.32869 | -1.22903 | 3.53887  |
| H  | -4.09513 | -1.98803 | 3.70648  |
| H  | -3.02255 | -0.7788  | 4.48579  |
| H  | -2.46451 | -1.66974 | 3.0346   |
| O  | -3.93036 | -0.24763 | 2.70951  |
| O  | -3.02648 | 0.75605  | 2.49481  |

transition state (1'-NH)

|   |          |          |          |
|---|----------|----------|----------|
| C | 5.49809  | -2.11075 | -0.33594 |
| C | 4.99902  | -0.90952 | -0.83422 |
| C | 3.64536  | -0.60229 | -0.69315 |
| C | 2.77689  | -1.51502 | -0.06094 |
| C | 3.29534  | -2.71203 | 0.43586  |
| C | 4.64909  | -3.0103  | 0.30852  |
| H | 6.55277  | -2.33874 | -0.4483  |
| H | 5.66038  | -0.20785 | -1.33594 |
| H | 2.60907  | -3.40515 | 0.91076  |
| H | 5.03817  | -3.94362 | 0.70053  |
| C | 0.99233  | -0.06923 | -0.24569 |
| N | 3.06553  | 0.5535   | -1.20866 |
| H | 3.44189  | 0.95165  | -2.22094 |
| N | 1.40754  | -1.26572 | -0.00457 |
| N | -0.34534 | 0.1951   | -0.19121 |
| C | 1.94098  | 1.11509  | -0.46136 |

|    |          |          |          |
|----|----------|----------|----------|
| C  | 1.34559  | 2.26784  | -1.28314 |
| C  | 2.35721  | 1.66269  | 0.92873  |
| C  | 2.28627  | 3.48048  | -1.33177 |
| H  | 0.41549  | 2.61019  | -0.81407 |
| H  | 1.11287  | 1.91816  | -2.29502 |
| C  | 3.26402  | 2.88788  | 0.79783  |
| H  | 1.45145  | 1.92868  | 1.48722  |
| H  | 2.86345  | 0.87012  | 1.48993  |
| H  | 1.7966   | 4.30257  | -1.86144 |
| H  | 3.18495  | 3.24749  | -1.91791 |
| H  | 3.49416  | 3.29397  | 1.78671  |
| H  | 4.22706  | 2.59138  | 0.36204  |
| N  | 2.71204  | 3.9555   | -0.02552 |
| H  | 1.93402  | 4.39662  | 0.45369  |
| H  | -0.67684 | 1.0221   | -0.65926 |
| C  | -1.30437 | -0.88393 | -0.04023 |
| H  | -1.31687 | -1.52765 | -0.9287  |
| H  | -0.95884 | -1.51276 | 0.7853   |
| C  | -2.68176 | -0.33936 | 0.23795  |
| C  | -3.74446 | -0.64748 | -0.61168 |
| C  | -2.91575 | 0.47119  | 1.35404  |
| C  | -5.01726 | -0.15347 | -0.33722 |
| C  | -4.19095 | 0.96067  | 1.61389  |
| C  | -5.25633 | 0.65192  | 0.76954  |
| H  | -4.36578 | 1.58427  | 2.48423  |
| H  | -6.25357 | 1.02695  | 0.96572  |
| H  | -2.09248 | 0.71125  | 2.01905  |
| H  | -3.58655 | -1.27214 | -1.48409 |
| Cl | -6.33153 | -0.55016 | -1.4096  |
| C  | 3.88157  | -0.63514 | -4.81691 |
| H  | 4.63306  | -1.39572 | -5.02625 |
| H  | 3.65276  | -0.05339 | -5.71034 |
| H  | 2.97655  | -1.0812  | -4.40346 |
| O  | 4.47394  | 0.22925  | -3.8306  |
| O  | 3.65832  | 1.19473  | -3.49332 |

product complex (1'-NH)

|   |          |          |          |
|---|----------|----------|----------|
| C | -4.88871 | -2.08363 | -0.96189 |
| C | -4.41025 | -0.94325 | -0.35973 |
| C | -3.02464 | -0.61466 | -0.4372  |
| C | -2.12479 | -1.5395  | -1.07504 |
| C | -2.65125 | -2.67605 | -1.69473 |
| C | -4.00929 | -2.94457 | -1.65255 |
| H | -5.94741 | -2.31397 | -0.91885 |
| H | -5.06176 | -0.26029 | 0.17125  |
| H | -1.95789 | -3.36044 | -2.17602 |
| H | -4.39972 | -3.83467 | -2.13713 |
| C | -0.32359 | -0.23469 | -0.51391 |
| N | -2.56417 | 0.52696  | 0.0909   |
| H | -2.9159  | 0.73258  | 1.50343  |
| N | -0.76646 | -1.37494 | -0.96706 |
| N | 1.00144  | -0.09207 | -0.31074 |
| C | -1.22707 | 0.97014  | -0.29848 |
| C | -0.71378 | 1.98803  | 0.7352   |
| C | -1.34726 | 1.69899  | -1.67558 |
| C | -1.57529 | 3.25884  | 0.75801  |
| H | 0.30449  | 2.2972   | 0.46848  |
| H | -0.68753 | 1.52565  | 1.72722  |
| C | -2.17592 | 2.98098  | -1.55946 |
| H | -0.33435 | 1.93627  | -2.01769 |
| H | -1.79353 | 1.01448  | -2.40775 |
| H | -1.14677 | 3.97387  | 1.46583  |
| H | -2.57861 | 3.01955  | 1.12452  |
| H | -2.18753 | 3.49811  | -2.52346 |
| H | -3.21234 | 2.72002  | -1.32059 |
| N | -1.7021  | 3.90357  | -0.53969 |
| H | -0.81316 | 4.30616  | -0.81904 |
| H | 1.32945  | 0.72771  | 0.17048  |
| C | 1.94393  | -1.18665 | -0.48619 |
| H | 1.8423   | -1.91084 | 0.32782  |
| H | 1.671    | -1.71017 | -1.40629 |
| C | 3.35478  | -0.66219 | -0.55602 |
| C | 4.25009  | -0.90453 | 0.48605  |
| C | 3.7787   | 0.08404  | -1.66065 |
| C | 5.54848  | -0.40566 | 0.413    |

|    |          |          |          |
|----|----------|----------|----------|
| C  | 5.07705  | 0.57799  | -1.71962 |
| C  | 5.97524  | 0.33702  | -0.68144 |
| H  | 5.40141  | 1.15119  | -2.58152 |
| H  | 6.98969  | 0.71523  | -0.72029 |
| H  | 3.08716  | 0.27106  | -2.47606 |
| H  | 3.94333  | -1.48197 | 1.35142  |
| Cl | 6.65381  | -0.71914 | 1.72099  |
| C  | -3.32869 | -1.22413 | 3.53397  |
| H  | -4.09023 | -1.98803 | 3.71138  |
| H  | -3.01765 | -0.7837  | 4.49069  |
| H  | -2.45471 | -1.67464 | 3.0444   |
| O  | -3.94506 | -0.26723 | 2.71441  |
| O  | -3.00688 | 0.77075  | 2.46051  |

reactant complex (2'-NH)

|   |          |          |          |
|---|----------|----------|----------|
| C | 5.14607  | -2.7437  | 0.22446  |
| C | 4.92203  | -1.38224 | 0.10243  |
| C | 3.62789  | -0.90755 | -0.15451 |
| C | 2.55418  | -1.82948 | -0.31928 |
| C | 2.81439  | -3.20701 | -0.1869  |
| C | 4.09016  | -3.66275 | 0.08786  |
| H | 6.14859  | -3.10034 | 0.43208  |
| H | 5.74268  | -0.67727 | 0.21039  |
| H | 1.98389  | -3.89129 | -0.31814 |
| H | 4.2796   | -4.72476 | 0.1907   |
| C | 1.02538  | -0.12387 | -0.69593 |
| N | 3.34613  | 0.41259  | -0.32962 |
| H | 4.10309  | 1.0664   | -0.21466 |
| N | 1.29796  | -1.41162 | -0.64866 |
| N | -0.17198 | 0.28657  | -1.12213 |
| C | 1.99638  | 0.95901  | -0.20817 |
| C | 1.94189  | 2.25508  | -1.03566 |
| C | 1.65318  | 1.27168  | 1.27278  |
| C | 2.76128  | 3.37902  | -0.39019 |
| H | 0.9094   | 2.5986   | -1.10971 |
| H | 2.29603  | 2.04451  | -2.05042 |
| C | 2.48584  | 2.43843  | 1.8102   |

|    |          |          |          |
|----|----------|----------|----------|
| H  | 0.59028  | 1.52909  | 1.33717  |
| H  | 1.8132   | 0.37105  | 1.87509  |
| H  | 2.62566  | 4.29848  | -0.9662  |
| H  | 3.83821  | 3.16587  | -0.42988 |
| H  | 2.16489  | 2.68036  | 2.82721  |
| H  | 3.54252  | 2.14791  | 1.8875   |
| N  | 2.41288  | 3.64282  | 0.99758  |
| H  | 1.47298  | 4.02656  | 1.04067  |
| H  | -0.51454 | 1.19376  | -0.86679 |
| C  | -1.17868 | -0.66911 | -1.55669 |
| H  | -1.69067 | -0.23024 | -2.4161  |
| H  | -0.66872 | -1.57726 | -1.88362 |
| C  | -2.19813 | -1.00973 | -0.49153 |
| C  | -3.55404 | -0.79727 | -0.74169 |
| C  | -1.80869 | -1.56206 | 0.7325   |
| C  | -4.49698 | -1.13703 | 0.22365  |
| C  | -2.76297 | -1.8913  | 1.68896  |
| C  | -4.11918 | -1.68227 | 1.44464  |
| H  | -2.45381 | -2.32099 | 2.63606  |
| H  | -4.86868 | -1.93762 | 2.18408  |
| H  | -0.7567  | -1.7413  | 0.92283  |
| H  | -3.87766 | -0.36217 | -1.68142 |
| Cl | -6.18804 | -0.86174 | -0.10569 |
| C  | -3.32865 | 2.69832  | 0.26256  |
| H  | -4.30632 | 2.77466  | -0.21507 |
| H  | -3.08205 | 3.63161  | 0.77718  |
| H  | -3.31484 | 1.86556  | 0.96803  |
| O  | -2.40288 | 2.46792  | -0.78325 |
| O  | -1.14329 | 2.38884  | -0.22929 |

transition state (2'-NH)

|   |         |          |          |
|---|---------|----------|----------|
| C | 5.19813 | -2.07204 | -0.31598 |
| C | 4.69906 | -0.87081 | -0.81427 |
| C | 3.3454  | -0.56358 | -0.6732  |
| C | 2.47693 | -1.47631 | -0.04099 |
| C | 2.99538 | -2.67332 | 0.45582  |
| C | 4.34913 | -2.97159 | 0.32848  |



|   |          |          |          |
|---|----------|----------|----------|
| H | 6.25281  | -2.30003 | -0.42835 |
| H | 5.36042  | -0.16914 | -1.31599 |
| H | 2.30911  | -3.36644 | 0.93071  |
| H | 4.73821  | -3.90491 | 0.72048  |
| C | 0.69237  | -0.03052 | -0.22574 |
| N | 2.76557  | 0.59221  | -1.18871 |
| H | 3.43368  | 1.27811  | -1.50673 |
| N | 1.10758  | -1.22701 | 0.01538  |
| N | -0.6453  | 0.23381  | -0.17125 |
| C | 1.64102  | 1.1538   | -0.44141 |
| C | 1.04563  | 2.30655  | -1.26319 |
| C | 2.05725  | 1.7014   | 0.94868  |
| C | 1.98631  | 3.51919  | -1.31181 |
| H | 0.11553  | 2.6489   | -0.79412 |
| H | 0.81292  | 1.95687  | -2.27507 |
| C | 2.96406  | 2.92659  | 0.81778  |
| H | 1.15149  | 1.96739  | 1.50717  |
| H | 2.56349  | 0.90883  | 1.50988  |
| H | 1.49664  | 4.34128  | -1.84148 |
| H | 2.88499  | 3.2862   | -1.89795 |
| H | 3.1942   | 3.33268  | 1.80666  |
| H | 3.92711  | 2.63009  | 0.38199  |
| N | 2.41209  | 3.99421  | -0.00556 |
| H | 1.63406  | 4.43533  | 0.47364  |
| H | -1.05779 | 1.20206  | -0.63476 |
| C | -1.60433 | -0.84522 | -0.02028 |
| H | -1.61683 | -1.48894 | -0.90874 |
| H | -1.2588  | -1.47405 | 0.80525  |
| C | -2.98172 | -0.30065 | 0.25791  |
| C | -4.04442 | -0.60877 | -0.59173 |
| C | -3.21571 | 0.5099   | 1.37399  |
| C | -5.31722 | -0.11476 | -0.31727 |
| C | -4.49091 | 0.99938  | 1.63384  |
| C | -5.55628 | 0.69063  | 0.78949  |
| H | -4.66574 | 1.62298  | 2.50418  |
| H | -6.55353 | 1.06566  | 0.98567  |
| H | -2.39244 | 0.74996  | 2.039    |
| H | -3.88651 | -1.23343 | -1.46413 |

|    |          |          |          |
|----|----------|----------|----------|
| Cl | -6.63149 | -0.51144 | -1.38965 |
| C  | -3.29301 | 1.7946   | -2.79469 |
| H  | -3.44642 | 1.34247  | -3.77402 |
| H  | -3.58626 | 2.84483  | -2.79721 |
| H  | -3.82939 | 1.24506  | -2.02055 |
| O  | -1.87884 | 1.70076  | -2.54529 |
| O  | -1.56557 | 2.21659  | -1.38472 |

product complex (2'-NH)

|   |          |          |          |
|---|----------|----------|----------|
| C | 5.14607  | -2.7386  | 0.22446  |
| C | 4.92713  | -1.38224 | 0.10243  |
| C | 3.62789  | -0.89735 | -0.15451 |
| C | 2.54398  | -1.82438 | -0.31928 |
| C | 2.81949  | -3.21211 | -0.1869  |
| C | 4.08506  | -3.66275 | 0.08786  |
| H | 6.14859  | -3.10034 | 0.43208  |
| H | 5.74268  | -0.67727 | 0.21039  |
| H | 1.98389  | -3.89129 | -0.31814 |
| H | 4.2796   | -4.72476 | 0.1907   |
| C | 1.01008  | -0.10857 | -0.70613 |
| N | 3.34613  | 0.40749  | -0.32452 |
| H | 4.10309  | 1.0664   | -0.21466 |
| N | 1.30816  | -1.42692 | -0.64356 |
| N | -0.16178 | 0.28657  | -1.11703 |
| C | 1.99128  | 0.95901  | -0.20817 |
| C | 1.94189  | 2.25508  | -1.03566 |
| C | 1.65318  | 1.27168  | 1.27278  |
| C | 2.76128  | 3.37902  | -0.39019 |
| H | 0.9043   | 2.5884   | -1.10461 |
| H | 2.29603  | 2.04451  | -2.05042 |
| C | 2.48584  | 2.43843  | 1.8102   |
| H | 0.59028  | 1.52909  | 1.32187  |
| H | 1.8132   | 0.37105  | 1.88019  |
| H | 2.62566  | 4.29848  | -0.9662  |
| H | 3.84331  | 3.16587  | -0.42988 |
| H | 2.16489  | 2.68036  | 2.82721  |
| H | 3.54252  | 2.14791  | 1.8875   |

|    |          |          |          |
|----|----------|----------|----------|
| N  | 2.41288  | 3.64282  | 0.99758  |
| H  | 1.47298  | 4.02146  | 1.04067  |
| H  | -0.75934 | 1.57626  | -0.64749 |
| C  | -1.17358 | -0.67421 | -1.55669 |
| H  | -1.68557 | -0.21494 | -2.4059  |
| H  | -0.68402 | -1.59256 | -1.88872 |
| C  | -2.19813 | -1.00973 | -0.49153 |
| C  | -3.55404 | -0.79727 | -0.74169 |
| C  | -1.80869 | -1.56206 | 0.7325   |
| C  | -4.49698 | -1.13703 | 0.22365  |
| C  | -2.76297 | -1.8913  | 1.68896  |
| C  | -4.11918 | -1.68227 | 1.44464  |
| H  | -2.45381 | -2.32099 | 2.63606  |
| H  | -4.86868 | -1.93762 | 2.18408  |
| H  | -0.7567  | -1.7413  | 0.92793  |
| H  | -3.87766 | -0.35707 | -1.67632 |
| Cl | -6.18804 | -0.86174 | -0.10569 |
| C  | -3.31845 | 2.69832  | 0.25746  |
| H  | -4.30632 | 2.77976  | -0.20997 |
| H  | -3.08715 | 3.63161  | 0.78738  |
| H  | -3.31994 | 1.86556  | 0.97823  |
| O  | -2.42328 | 2.46792  | -0.79345 |
| O  | -1.11269 | 2.36844  | -0.22929 |

reactant complex (3'-NH)

|   |          |          |          |
|---|----------|----------|----------|
| C | -6.08017 | -1.17035 | -0.31193 |
| C | -5.19486 | -0.34726 | 0.37942  |
| C | -3.82127 | -0.58574 | 0.30844  |
| C | -3.33643 | -1.67234 | -0.44692 |
| C | -4.23771 | -2.48564 | -1.13489 |
| C | -5.60512 | -2.23462 | -1.07903 |
| H | -7.14562 | -0.9743  | -0.25341 |
| H | -5.56833 | 0.48115  | 0.97554  |
| H | -3.83984 | -3.32176 | -1.69989 |
| H | -6.29746 | -2.87052 | -1.61924 |
| C | -1.13315 | -1.1314  | 0.01376  |
| N | -2.87357 | 0.1572   | 0.99972  |

|    |          |          |          |
|----|----------|----------|----------|
| H  | -3.23236 | 1.00169  | 1.4199   |
| N  | -1.97906 | -1.9919  | -0.42957 |
| N  | 0.22077  | -1.45677 | -0.08211 |
| H  | 0.275    | -2.29634 | -0.65188 |
| C  | 1.02872  | -1.64841 | 1.12444  |
| H  | 0.66268  | -2.50198 | 1.71231  |
| H  | 0.93932  | -0.76933 | 1.7632   |
| C  | 2.48317  | -1.86698 | 0.78322  |
| C  | 3.108    | -1.08532 | -0.1919  |
| C  | 3.22486  | -2.83338 | 1.46439  |
| C  | 4.45706  | -1.28056 | -0.46368 |
| C  | 4.57743  | -3.01229 | 1.18499  |
| H  | 2.74183  | -3.45177 | 2.21478  |
| C  | 5.20638  | -2.23706 | 0.21633  |
| H  | 5.14611  | -3.76697 | 1.71769  |
| H  | 6.25604  | -2.37191 | -0.01538 |
| C  | -1.55948 | 0.29763  | 0.37034  |
| C  | -0.6388  | 1.06974  | 1.31699  |
| C  | -1.60709 | 1.07767  | -0.97043 |
| C  | -1.03299 | 2.55037  | 1.44543  |
| H  | 0.37822  | 1.04674  | 0.9193   |
| H  | -0.64612 | 0.61071  | 2.31235  |
| C  | -1.98988 | 2.54632  | -0.75964 |
| H  | -0.62062 | 1.02259  | -1.44025 |
| H  | -2.32716 | 0.60432  | -1.6474  |
| H  | -0.29845 | 3.06914  | 2.06441  |
| H  | -2.00068 | 2.65695  | 1.95919  |
| H  | -1.97759 | 3.08299  | -1.71138 |
| H  | -3.02164 | 2.60407  | -0.37908 |
| N  | -1.13661 | 3.24587  | 0.17806  |
| H  | -0.22398 | 3.43864  | -0.22469 |
| H  | 2.54282  | -0.33645 | -0.7346  |
| Cl | 5.22976  | -0.30635 | -1.68408 |
| C  | 2.06502  | 5.2159   | 0.05316  |
| H  | 2.68746  | 5.59862  | 0.86395  |
| H  | 1.11569  | 5.75358  | 0.0202   |
| H  | 2.58698  | 5.31422  | -0.90016 |
| O  | 1.85674  | 3.84356  | 0.3517   |

|   |         |         |          |
|---|---------|---------|----------|
| O | 1.11644 | 3.27037 | -0.66095 |
|---|---------|---------|----------|

transition state (3'-NH)

|   |          |          |          |
|---|----------|----------|----------|
| C | 5.78051  | -0.82003 | 0.25856  |
| C | 4.87885  | -0.00155 | -0.41657 |
| C | 3.50647  | -0.23497 | -0.30699 |
| C | 3.04145  | -1.3123  | 0.47361  |
| C | 3.95872  | -2.1218  | 1.14421  |
| C | 5.32492  | -1.87623 | 1.04832  |
| H | 6.84438  | -0.62662 | 0.16943  |
| H | 5.23784  | 0.82068  | -1.02965 |
| H | 3.5737   | -2.95058 | 1.72873  |
| H | 6.03031  | -2.50891 | 1.5753   |
| C | 0.83041  | -0.77077 | 0.06503  |
| N | 2.54629  | 0.50335  | -0.98453 |
| H | 2.89707  | 1.35204  | -1.40304 |
| N | 1.68197  | -1.62671 | 0.50388  |
| N | -0.52521 | -1.08203 | 0.21234  |
| H | -0.57278 | -1.8906  | 0.82482  |
| C | -1.35463 | -1.31096 | -0.96819 |
| H | -1.19236 | -2.32319 | -1.36439 |
| H | -1.04289 | -0.62973 | -1.76081 |
| C | -2.82917 | -1.11154 | -0.69995 |
| C | -3.2671  | -0.33082 | 0.36938  |
| C | -3.77255 | -1.68864 | -1.55475 |
| C | -4.63072 | -0.13199 | 0.5625   |
| C | -5.13199 | -1.47802 | -1.35007 |
| H | -3.44128 | -2.30859 | -2.38267 |
| C | -5.57623 | -0.69518 | -0.28668 |
| H | -5.85718 | -1.93115 | -2.01758 |
| H | -6.63293 | -0.53003 | -0.11465 |
| C | 1.24163  | 0.64956  | -0.33457 |
| C | 0.30196  | 1.38896  | -1.29614 |
| C | 1.31603  | 1.46545  | 0.98738  |
| C | 0.67809  | 2.86918  | -1.45675 |
| H | -0.71699 | 1.33935  | -0.89946 |
| H | 0.31771  | 0.90201  | -2.27745 |

|    |          |         |          |
|----|----------|---------|----------|
| C  | 1.67184  | 2.93103 | 0.73458  |
| H  | 0.34151  | 1.40034 | 1.48529  |
| H  | 2.05316  | 1.00503 | 1.65356  |
| H  | -0.06402 | 3.36317 | -2.09036 |
| H  | 1.63327  | 2.96854 | -1.99058 |
| H  | 1.66708  | 3.48512 | 1.6774   |
| H  | 2.69615  | 3.0029  | 0.34559  |
| N  | 0.78991  | 3.60393 | -0.20836 |
| H  | -0.20844 | 3.97487 | 0.395    |
| H  | -2.54274 | 0.10559 | 1.04662  |
| Cl | -5.16297 | 0.84607 | 1.90445  |
| C  | -0.79931 | 6.62236 | 1.57204  |
| H  | -0.64827 | 7.64075 | 1.21552  |
| H  | 0.0866   | 6.25225 | 2.08894  |
| H  | -1.67753 | 6.55808 | 2.21516  |
| O  | -1.02107 | 5.83059 | 0.39103  |
| O  | -1.21759 | 4.57282 | 0.69193  |

product complex (3'-NH)

|   |          |          |          |
|---|----------|----------|----------|
| C | -6.08017 | -1.17035 | -0.31193 |
| C | -5.19486 | -0.34726 | 0.37942  |
| C | -3.82127 | -0.58574 | 0.30844  |
| C | -3.33643 | -1.67234 | -0.44692 |
| C | -4.23771 | -2.48564 | -1.13489 |
| C | -5.60512 | -2.23462 | -1.07903 |
| H | -7.14562 | -0.9743  | -0.25341 |
| H | -5.56833 | 0.48115  | 0.97554  |
| H | -3.83984 | -3.32176 | -1.69989 |
| H | -6.29746 | -2.87052 | -1.61924 |
| C | -1.13315 | -1.1314  | 0.01376  |
| N | -2.87357 | 0.1572   | 0.99972  |
| H | -3.23236 | 1.00169  | 1.4199   |
| N | -1.97906 | -1.9919  | -0.42957 |
| N | 0.22077  | -1.45677 | -0.08211 |
| H | 0.275    | -2.29634 | -0.65188 |
| C | 1.02872  | -1.64841 | 1.12444  |
| H | 0.66268  | -2.50198 | 1.71231  |

|    |          |          |          |
|----|----------|----------|----------|
| H  | 0.93932  | -0.76933 | 1.7632   |
| C  | 2.48317  | -1.86698 | 0.78322  |
| C  | 3.108    | -1.08532 | -0.1919  |
| C  | 3.22486  | -2.83338 | 1.46439  |
| C  | 4.45706  | -1.28056 | -0.46368 |
| C  | 4.57743  | -3.01229 | 1.18499  |
| H  | 2.74183  | -3.45177 | 2.21478  |
| C  | 5.20638  | -2.23706 | 0.21633  |
| H  | 5.14611  | -3.76697 | 1.71769  |
| H  | 6.25604  | -2.37191 | -0.01538 |
| C  | -1.55948 | 0.29763  | 0.37034  |
| C  | -0.6388  | 1.06974  | 1.31699  |
| C  | -1.60709 | 1.07767  | -0.97043 |
| C  | -1.03719 | 2.55037  | 1.44543  |
| H  | 0.37822  | 1.05094  | 0.9193   |
| H  | -0.64612 | 0.61911  | 2.31235  |
| C  | -1.99408 | 2.54632  | -0.75964 |
| H  | -0.62062 | 1.02259  | -1.44025 |
| H  | -2.32716 | 0.61272  | -1.6474  |
| H  | -0.29845 | 3.06914  | 2.06021  |
| H  | -2.00488 | 2.65275  | 1.96339  |
| H  | -1.97339 | 3.08299  | -1.71138 |
| H  | -3.02584 | 2.59987  | -0.37908 |
| N  | -1.14501 | 3.23747  | 0.18226  |
| H  | 0.17082  | 3.45124  | -0.36329 |
| H  | 2.54282  | -0.33645 | -0.7346  |
| Cl | 5.22976  | -0.30635 | -1.68408 |
| C  | 2.06502  | 5.2117   | 0.05316  |
| H  | 2.68746  | 5.59862  | 0.86395  |
| H  | 1.11569  | 5.76198  | 0.0202   |
| H  | 2.58698  | 5.31842  | -0.90436 |
| O  | 1.86094  | 3.84776  | 0.3643   |
| O  | 1.09544  | 3.27037  | -0.66935 |

reactant complex (UQH<sub>2</sub>)

|   |          |         |          |
|---|----------|---------|----------|
| C | -0.88843 | 4.59508 | -0.88448 |
| C | -1.18658 | 3.32985 | -0.45229 |

|   |          |          |          |
|---|----------|----------|----------|
| C | -0.15339 | 2.33692  | -0.37494 |
| C | 1.16773  | 2.66608  | -0.85055 |
| C | 1.42856  | 3.97305  | -1.28599 |
| C | 0.42727  | 4.92825  | -1.29088 |
| H | -1.66548 | 5.351    | -0.91168 |
| H | -2.17881 | 3.03951  | -0.11902 |
| H | 2.42495  | 4.20223  | -1.6406  |
| H | 0.64212  | 5.93715  | -1.63351 |
| C | 1.87774  | 0.51882  | -0.47194 |
| N | -0.40541 | 1.12616  | 0.10499  |
| N | 2.1204   | 1.70061  | -0.97911 |
| N | 2.74831  | -0.47845 | -0.71289 |
| C | 0.7063   | 0.24672  | 0.45911  |
| C | 0.22399  | -1.21817 | 0.48003  |
| C | 1.20113  | 0.63134  | 1.89759  |
| C | -0.72571 | -1.5247  | 1.64792  |
| H | 1.08743  | -1.88004 | 0.6031   |
| H | -0.26052 | -1.45386 | -0.47278 |
| C | 0.17755  | 0.2597   | 2.97352  |
| H | 2.13703  | 0.08834  | 2.07903  |
| H | 1.42898  | 1.6997   | 1.92213  |
| H | -0.94452 | -2.5963  | 1.65552  |
| H | -1.67767 | -1.00999 | 1.50056  |
| H | 0.58535  | 0.50421  | 3.95705  |
| H | -0.73121 | 0.85693  | 2.84174  |
| N | -0.20675 | -1.14169 | 2.95135  |
| H | 0.58435  | -1.72556 | 3.20857  |
| H | 2.58034  | -1.36632 | -0.26654 |
| C | 3.97552  | -0.33075 | -1.47449 |
| H | 4.02667  | -1.13574 | -2.21347 |
| H | 3.89295  | 0.61638  | -2.01341 |
| C | 5.20908  | -0.34448 | -0.6014  |
| C | 6.14365  | -1.3727  | -0.71973 |
| C | 5.4227   | 0.67161  | 0.33635  |
| C | 7.27388  | -1.37741 | 0.09442  |
| C | 6.55426  | 0.65177  | 1.14345  |
| C | 7.49166  | -0.37436 | 1.03063  |
| H | 6.7183   | 1.44399  | 1.86617  |



|    |          |          |          |
|----|----------|----------|----------|
| H  | 8.37675  | -0.39499 | 1.65498  |
| H  | 4.70153  | 1.47785  | 0.42253  |
| H  | 6.00072  | -2.16839 | -1.4433  |
| Cl | 8.4305   | -2.66989 | -0.06566 |
| H  | -6.69014 | -2.68896 | -1.46357 |
| O  | -6.97839 | -2.2454  | -0.65676 |
| C  | -5.9357  | -1.43803 | -0.27979 |
| C  | -6.07327 | -0.57148 | 0.80288  |
| C  | -4.97952 | 0.23679  | 1.16996  |
| C  | -3.77119 | 0.18638  | 0.44307  |
| C  | -3.66858 | -0.68789 | -0.64198 |
| C  | -4.74466 | -1.50812 | -0.98984 |
| C  | -7.37197 | -0.51502 | 1.56122  |
| H  | -8.12144 | -1.15462 | 1.09593  |
| H  | -7.24228 | -0.84383 | 2.59816  |
| H  | -7.76671 | 0.50532  | 1.59789  |
| C  | -5.10191 | 1.17715  | 2.3377   |
| H  | -4.14248 | 1.65963  | 2.5241   |
| H  | -5.84825 | 1.9622   | 2.15597  |
| H  | -5.41036 | 0.65345  | 3.24877  |
| O  | -2.74621 | 0.99712  | 0.78278  |
| H  | -1.84228 | 0.88728  | 0.44275  |
| O  | -2.49387 | -0.75309 | -1.37835 |
| C  | -2.54024 | 0.01151  | -2.57698 |
| H  | -1.56837 | -0.10526 | -3.06236 |
| H  | -2.713   | 1.07023  | -2.35612 |
| H  | -3.32712 | -0.35618 | -3.24306 |
| O  | -4.70978 | -2.36957 | -2.07055 |
| C  | -3.81846 | -3.47406 | -1.92539 |
| H  | -3.92766 | -4.08085 | -2.82719 |
| H  | -4.08644 | -4.0722  | -1.04763 |
| H  | -2.78729 | -3.12577 | -1.83262 |

transition state (UQH<sub>2</sub>)

|   |          |         |          |
|---|----------|---------|----------|
| C | -1.03543 | 4.44221 | -0.68901 |
| C | -1.26176 | 3.15498 | -0.26315 |
| C | -0.19749 | 2.20894 | -0.27544 |

|   |          |          |          |
|---|----------|----------|----------|
| C | 1.0769   | 2.59041  | -0.81202 |
| C | 1.26593  | 3.90832  | -1.23937 |
| C | 0.23191  | 4.82772  | -1.17108 |
| H | -1.84111 | 5.16798  | -0.65505 |
| H | -2.22046 | 2.83367  | 0.12922  |
| H | 2.23666  | 4.17694  | -1.64162 |
| H | 0.39251  | 5.84573  | -1.51007 |
| C | 1.89836  | 0.46944  | -0.50698 |
| N | -0.38506 | 0.96717  | 0.18471  |
| N | 2.07421  | 1.66652  | -0.98484 |
| N | 2.82362  | -0.4763  | -0.77795 |
| C | 0.75031  | 0.09072  | 0.43037  |
| C | 0.29314  | -1.37946 | 0.31195  |
| C | 1.26594  | 0.34462  | 1.88311  |
| C | -0.628   | -1.80994 | 1.46317  |
| H | 1.16805  | -2.04088 | 0.34265  |
| H | -0.20525 | -1.5278  | -0.64947 |
| C | 0.26176  | -0.14243 | 2.93083  |
| H | 2.21773  | -0.1895  | 2.00783  |
| H | 1.47483  | 1.41366  | 1.99965  |
| H | -0.83436 | -2.88092 | 1.37169  |
| H | -1.58657 | -1.29318 | 1.38779  |
| H | 0.66866  | 0.0259   | 3.93322  |
| H | -0.66411 | 0.43784  | 2.85493  |
| N | -0.0892  | -1.54608 | 2.78848  |
| H | 0.73654  | -2.11956 | 2.94559  |
| H | 2.73906  | -1.36967 | -0.32354 |
| C | 4.04321  | -0.22684 | -1.52527 |
| H | 4.14227  | -0.99317 | -2.30091 |
| H | 3.90746  | 0.73822  | -2.01615 |
| C | 5.26975  | -0.21649 | -0.6429  |
| C | 6.23627  | -1.21207 | -0.76985 |
| C | 5.43803  | 0.78387  | 0.31945  |
| C | 7.35413  | -1.19968 | 0.05943  |
| C | 6.5581   | 0.78198  | 1.14094  |
| C | 7.52754  | -0.21141 | 1.0194   |
| H | 6.68743  | 1.563    | 1.88307  |
| H | 8.4047   | -0.21873 | 1.65552  |

|    |          |          |          |
|----|----------|----------|----------|
| H  | 4.69014  | 1.56522  | 0.41115  |
| H  | 6.12755  | -1.99578 | -1.51242 |
| Cl | 8.55276  | -2.4522  | -0.1115  |
| H  | -6.82388 | -2.23338 | -1.69727 |
| O  | -7.11192 | -1.86762 | -0.84444 |
| C  | -6.02355 | -1.21372 | -0.35309 |
| C  | -6.10429 | -0.48079 | 0.83597  |
| C  | -4.96328 | 0.16889  | 1.31666  |
| C  | -3.72755 | 0.11863  | 0.61016  |
| C  | -3.6852  | -0.62931 | -0.59301 |
| C  | -4.81725 | -1.29028 | -1.05338 |
| C  | -7.4094  | -0.41407 | 1.5786   |
| H  | -8.19542 | -0.93936 | 1.03522  |
| H  | -7.32561 | -0.86467 | 2.57444  |
| H  | -7.73042 | 0.62304  | 1.72665  |
| C  | -5.01996 | 0.95464  | 2.5947   |
| H  | -4.03849 | 1.3731   | 2.81637  |
| H  | -5.74205 | 1.77803  | 2.53159  |
| H  | -5.32961 | 0.32788  | 3.43943  |
| O  | -2.67922 | 0.76543  | 1.06402  |
| H  | -1.49875 | 0.71975  | 0.53397  |
| O  | -2.50437 | -0.70239 | -1.29923 |
| C  | -2.50223 | 0.0835   | -2.48494 |
| H  | -1.51764 | -0.04074 | -2.93994 |
| H  | -2.65936 | 1.14202  | -2.2516  |
| H  | -3.27465 | -0.25608 | -3.18157 |
| O  | -4.83603 | -2.01531 | -2.2302  |
| C  | -4.06239 | -3.21028 | -2.18658 |
| H  | -4.20458 | -3.70466 | -3.14918 |
| H  | -4.40759 | -3.86858 | -1.38145 |
| H  | -3.00429 | -2.98068 | -2.04028 |

product complex (UQH<sub>2</sub>)

|   |          |         |          |
|---|----------|---------|----------|
| C | -0.88343 | 4.60008 | -0.88448 |
| C | -1.18158 | 3.32485 | -0.45229 |
| C | -0.15339 | 2.35192 | -0.37494 |
| C | 1.15773  | 2.67108 | -0.85055 |

|   |          |          |          |
|---|----------|----------|----------|
| C | 1.42356  | 3.97305  | -1.28599 |
| C | 0.42227  | 4.93325  | -1.29088 |
| H | -1.66548 | 5.351    | -0.91668 |
| H | -2.17881 | 3.04951  | -0.12902 |
| H | 2.42495  | 4.19723  | -1.6406  |
| H | 0.64212  | 5.93715  | -1.63351 |
| C | 1.87774  | 0.52382  | -0.47694 |
| N | -0.40541 | 1.11616  | 0.09999  |
| N | 2.1204   | 1.69561  | -0.97911 |
| N | 2.74831  | -0.48345 | -0.71289 |
| C | 0.7013   | 0.24672  | 0.46911  |
| C | 0.22399  | -1.21817 | 0.48003  |
| C | 1.20113  | 0.62634  | 1.89759  |
| C | -0.72571 | -1.5247  | 1.64792  |
| H | 1.08743  | -1.88504 | 0.6031   |
| H | -0.25552 | -1.45386 | -0.47278 |
| C | 0.17755  | 0.2597   | 2.97352  |
| H | 2.14203  | 0.09334  | 2.08903  |
| H | 1.42398  | 1.6997   | 1.91713  |
| H | -0.94452 | -2.5963  | 1.65552  |
| H | -1.67767 | -1.00999 | 1.50556  |
| H | 0.58035  | 0.50421  | 3.96205  |
| H | -0.73121 | 0.85693  | 2.84174  |
| N | -0.20675 | -1.14169 | 2.95135  |
| H | 0.58435  | -1.72556 | 3.20357  |
| H | 2.59034  | -1.36632 | -0.26154 |
| C | 3.97552  | -0.33075 | -1.47449 |
| H | 4.03167  | -1.13574 | -2.21347 |
| H | 3.89295  | 0.61638  | -2.00841 |
| C | 5.20908  | -0.34448 | -0.6014  |
| C | 6.14365  | -1.3727  | -0.71973 |
| C | 5.4227   | 0.67161  | 0.33635  |
| C | 7.27388  | -1.37741 | 0.09442  |
| C | 6.55426  | 0.65177  | 1.14345  |
| C | 7.49166  | -0.37436 | 1.03063  |
| H | 6.7183   | 1.44399  | 1.86617  |
| H | 8.37675  | -0.39499 | 1.65498  |
| H | 4.70153  | 1.47785  | 0.42253  |

|    |          |          |          |
|----|----------|----------|----------|
| H  | 6.00072  | -2.16839 | -1.4433  |
| Cl | 8.4305   | -2.66989 | -0.06566 |
| H  | -6.68514 | -2.69396 | -1.46357 |
| O  | -6.97339 | -2.2404  | -0.65676 |
| C  | -5.9407  | -1.44303 | -0.27979 |
| C  | -6.07327 | -0.56648 | 0.80788  |
| C  | -4.99452 | 0.23679  | 1.17496  |
| C  | -3.75619 | 0.20638  | 0.45307  |
| C  | -3.66358 | -0.69789 | -0.65198 |
| C  | -4.73466 | -1.50812 | -0.99484 |
| C  | -7.37197 | -0.51502 | 1.56122  |
| H  | -8.12144 | -1.15462 | 1.09593  |
| H  | -7.24228 | -0.84383 | 2.59816  |
| H  | -7.76671 | 0.50532  | 1.59789  |
| C  | -5.10191 | 1.17715  | 2.3377   |
| H  | -4.14248 | 1.65963  | 2.5191   |
| H  | -5.84825 | 1.9572   | 2.15097  |
| H  | -5.41036 | 0.65345  | 3.24877  |
| O  | -2.78121 | 0.98212  | 0.78278  |
| H  | -1.35728 | 0.91228  | 0.34275  |
| O  | -2.49887 | -0.75309 | -1.37335 |
| C  | -2.54024 | 0.01151  | -2.57698 |
| H  | -1.56837 | -0.10526 | -3.05736 |
| H  | -2.708   | 1.07023  | -2.35612 |
| H  | -3.32712 | -0.35618 | -3.24306 |
| O  | -4.70978 | -2.36957 | -2.07055 |
| C  | -3.81846 | -3.47406 | -1.92539 |
| H  | -3.92766 | -4.07585 | -2.82719 |
| H  | -4.08644 | -4.0722  | -1.04763 |
| H  | -2.78729 | -3.12577 | -1.83262 |

[Liproxstatin-2]

transition state (1'-NH)

|   |          |          |         |
|---|----------|----------|---------|
| C | -5.37114 | -1.55779 | 0.72715 |
| C | -4.66552 | -0.39596 | 1.03197 |
| C | -3.28952 | -0.33405 | 0.80925 |

|   |          |          |          |
|---|----------|----------|----------|
| C | -2.60785 | -1.4534  | 0.28965  |
| C | -3.3319  | -2.60786 | -0.01286 |
| C | -4.70717 | -2.6632  | 0.19588  |
| H | -6.44131 | -1.59449 | 0.90155  |
| H | -5.18257 | 0.46623  | 1.44522  |
| H | -2.78745 | -3.46171 | -0.4021  |
| H | -5.25658 | -3.56678 | -0.04484 |
| C | -0.61244 | -0.30379 | 0.20786  |
| N | -2.51015 | 0.77238  | 1.13518  |
| H | -2.65277 | 1.19587  | 2.20301  |
| N | -1.22191 | -1.43908 | 0.1542   |
| N | 0.74392  | -0.26185 | 0.06698  |
| C | -1.35245 | 1.03615  | 0.28269  |
| C | -0.53935 | 2.17586  | 0.91542  |
| C | -1.74879 | 1.45502  | -1.15717 |
| C | -1.27485 | 3.5203   | 0.82635  |
| H | 0.40376  | 2.29767  | 0.36972  |
| H | -0.30609 | 1.92981  | 1.9571   |
| C | -2.44015 | 2.82013  | -1.17156 |
| H | -0.84266 | 1.49014  | -1.77412 |
| H | -2.40512 | 0.69061  | -1.58662 |
| H | -0.63696 | 4.31422  | 1.22499  |
| H | -2.1698  | 3.514    | 1.46297  |
| H | -2.65192 | 3.12363  | -2.20061 |
| H | -3.41518 | 2.74752  | -0.67247 |
| N | -1.68469 | 3.88299  | -0.52052 |
| H | -0.87001 | 4.11862  | -1.07766 |
| H | 1.21646  | 0.54996  | 0.42856  |
| C | 1.51845  | -1.49158 | 0.04494  |
| H | 1.54633  | -1.95156 | 1.04091  |
| H | 0.99643  | -2.19146 | -0.60829 |
| C | 2.9126   | -1.24318 | -0.46724 |
| C | 3.9173   | -0.67317 | 0.32235  |
| C | 3.25128  | -1.58317 | -1.78094 |
| C | 5.20297  | -0.45151 | -0.16235 |
| C | 4.52964  | -1.37032 | -2.2856  |
| C | 5.50785  | -0.80316 | -1.4731  |
| H | 5.95141  | -0.01059 | 0.4853   |

|    |          |          |          |
|----|----------|----------|----------|
| H  | 4.76138  | -1.64795 | -3.30793 |
| H  | 6.50942  | -0.63418 | -1.85338 |
| H  | 2.48722  | -2.02559 | -2.41234 |
| Cl | 3.57323  | -0.21175 | 1.97464  |
| C  | -4.47877 | 0.54231  | 4.75708  |
| H  | -5.51642 | 0.82556  | 4.9306   |
| H  | -3.89526 | 0.60822  | 5.67586  |
| H  | -4.41171 | -0.45751 | 4.32712  |
| O  | -3.97293 | 1.49839  | 3.80793  |
| O  | -2.72015 | 1.26103  | 3.51578  |

[Liproxstatin-3]

transition state (1'-NH)

|   |          |          |          |
|---|----------|----------|----------|
| C | -4.90617 | -2.08887 | 0.38093  |
| C | -4.32984 | -0.90385 | 0.83269  |
| C | -2.98022 | -0.645   | 0.59061  |
| C | -2.19132 | -1.59051 | -0.09598 |
| C | -2.78809 | -2.76992 | -0.54618 |
| C | -4.13815 | -3.02024 | -0.31771 |
| H | -5.95712 | -2.27895 | 0.57163  |
| H | -4.92773 | -0.17638 | 1.37581  |
| H | -2.16332 | -3.48762 | -1.06732 |
| H | -4.58704 | -3.94088 | -0.67437 |
| C | -0.3455  | -0.21118 | -0.04114 |
| N | -2.32618 | 0.49369  | 1.05273  |
| H | -2.62337 | 0.88915  | 2.08462  |
| N | -0.82487 | -1.38877 | -0.26823 |
| N | 0.99823  | -0.02151 | -0.09898 |
| C | -1.23212 | 1.00979  | 0.23368  |
| C | -0.54236 | 2.13638  | 1.01791  |
| C | -1.71655 | 1.57526  | -1.12658 |
| C | -1.43256 | 3.38214  | 1.12724  |
| H | 0.37204  | 2.44698  | 0.49881  |
| H | -0.2566  | 1.77098  | 2.00946  |
| C | -2.56507 | 2.83452  | -0.93719 |
| H | -0.84132 | 1.80952  | -1.74627 |

|   |          |          |          |
|---|----------|----------|----------|
| H | -2.28778 | 0.80335  | -1.653   |
| H | -0.88142 | 4.18403  | 1.62668  |
| H | -2.30154 | 3.1802   | 1.76776  |
| H | -2.84269 | 3.25258  | -1.90874 |
| H | -3.50838 | 2.57231  | -0.44087 |
| N | -1.9219  | 3.87781  | -0.14925 |
| H | -1.15932 | 4.29019  | -0.67647 |
| H | 1.35823  | 0.91685  | -0.1178  |
| C | 1.89893  | -1.08071 | -0.52499 |
| H | 1.6353   | -1.98287 | 0.03287  |
| H | 1.73235  | -1.31687 | -1.58351 |
| C | 3.33201  | -0.67567 | -0.29591 |
| C | 3.90137  | -0.71447 | 0.99193  |
| C | 4.10107  | -0.23763 | -1.3762  |
| C | 5.22712  | -0.30206 | 1.14686  |
| C | 5.42294  | 0.16761  | -1.20719 |
| C | 5.98627  | 0.13627  | 0.06387  |
| H | 5.67414  | -0.33006 | 2.13644  |
| H | 6.00444  | 0.50134  | -2.06001 |
| H | 7.01457  | 0.44784  | 0.21537  |
| H | 3.65484  | -0.22133 | -2.3669  |
| C | 3.11744  | -1.21001 | 2.17668  |
| H | 2.14603  | -0.71523 | 2.25537  |
| H | 2.92254  | -2.28511 | 2.09913  |
| H | 3.66584  | -1.04073 | 3.10539  |
| C | -3.0849  | -0.85391 | 4.57609  |
| H | -3.89577 | -1.54649 | 4.79939  |
| H | -2.70817 | -0.38469 | 5.48543  |
| H | -2.27977 | -1.35345 | 4.03643  |
| O | -3.66391 | 0.15579  | 3.72984  |
| O | -2.77808 | 1.05621  | 3.38974  |

[Liproxstatin-4]

transition state (1'-NH)

|   |         |          |          |
|---|---------|----------|----------|
| C | 5.73854 | -0.90214 | -0.4608  |
| C | 4.75228 | -0.04163 | -0.93506 |



|   |          |          |          |
|---|----------|----------|----------|
| C | 3.40418  | -0.3463  | -0.73215 |
| C | 3.0457   | -1.53601 | -0.0682  |
| C | 4.04777  | -2.38595 | 0.4026   |
| C | 5.39047  | -2.07095 | 0.21811  |
| H | 6.78302  | -0.65439 | -0.61874 |
| H | 5.02573  | 0.86857  | -1.46207 |
| H | 3.74641  | -3.3006  | 0.90209  |
| H | 6.16126  | -2.73711 | 0.5896   |
| C | 0.79024  | -1.02431 | -0.18932 |
| N | 2.3609   | 0.42276  | -1.21556 |
| H | 2.41262  | 0.94393  | -2.24585 |
| N | 1.70756  | -1.89603 | 0.05335  |
| N | -0.5083  | -1.50041 | -0.26153 |
| H | -0.47184 | -2.50869 | -0.16592 |
| C | -1.63087 | -0.91811 | 0.45584  |
| H | -1.37648 | 0.08652  | 0.7978   |
| H | -1.8208  | -1.48747 | 1.37541  |
| C | -2.9044  | -0.86247 | -0.35907 |
| C | -4.09859 | -0.40451 | 0.20735  |
| C | -2.941   | -1.26432 | -1.69527 |
| C | -5.28495 | -0.34822 | -0.51525 |
| C | -4.11916 | -1.21575 | -2.43543 |
| H | -2.01756 | -1.61262 | -2.1449  |
| C | -5.29347 | -0.75841 | -1.8454  |
| H | -4.1171  | -1.53525 | -3.47189 |
| H | -6.21692 | -0.71773 | -2.4127  |
| C | 1.10545  | 0.45696  | -0.4654  |
| C | 0.07156  | 1.15946  | -1.36023 |
| C | 1.25689  | 1.21334  | 0.87781  |
| C | 0.36216  | 2.65234  | -1.53396 |
| H | -0.92697 | 1.06214  | -0.9311  |
| H | 0.04856  | 0.65293  | -2.32925 |
| C | 1.54529  | 2.69924  | 0.67439  |
| H | 0.33656  | 1.10075  | 1.46413  |
| H | 2.05549  | 0.74066  | 1.45858  |
| H | -0.43824 | 3.10127  | -2.13261 |
| H | 1.2821   | 2.81121  | -2.11509 |
| H | 1.60972  | 3.19401  | 1.64975  |

|    |          |          |          |
|----|----------|----------|----------|
| H  | 2.53206  | 2.8257   | 0.20794  |
| C  | 0.48666  | 3.38327  | -0.19425 |
| H  | -0.48006 | 3.29127  | 0.32412  |
| C  | 0.7832   | 4.86669  | -0.38656 |
| H  | 0.00959  | 5.3532   | -0.98836 |
| H  | 0.83823  | 5.38885  | 0.57333  |
| H  | 1.74168  | 5.01039  | -0.89769 |
| H  | -6.18703 | 0.01369  | -0.03612 |
| Cl | -4.11671 | 0.12506  | 1.87395  |
| C  | 3.6321   | -0.34975 | -4.84508 |
| H  | 4.65095  | -0.69645 | -5.0148  |
| H  | 3.21274  | 0.09309  | -5.74897 |
| H  | 2.99812  | -1.15856 | -4.48054 |
| O  | 3.73517  | 0.66318  | -3.82811 |
| O  | 2.56244  | 1.16244  | -3.53389 |

[Liproxstatin-5]

transition state (1'-NH)

|   |          |          |          |
|---|----------|----------|----------|
| C | -5.57227 | -1.35522 | 0.0012   |
| C | -4.75106 | -0.34863 | 0.50284  |
| C | -3.36628 | -0.4318  | 0.343    |
| C | -2.80379 | -1.54689 | -0.31036 |
| C | -3.64152 | -2.54536 | -0.8081  |
| C | -5.02255 | -2.45164 | -0.66383 |
| H | -6.64713 | -1.27792 | 0.12778  |
| H | -5.18291 | 0.50435  | 1.01949  |
| H | -3.18167 | -3.39787 | -1.2966  |
| H | -5.6653  | -3.23181 | -1.0562  |
| C | -0.66036 | -0.69545 | -0.1159  |
| N | -2.47699 | 0.5024   | 0.85331  |
| H | -2.73403 | 0.98802  | 1.86255  |
| N | -1.41912 | -1.7001  | -0.37881 |
| N | 0.71184  | -0.86893 | -0.31021 |
| H | 0.82422  | -1.75487 | -0.79436 |
| C | 1.64177  | -0.81772 | 0.81789  |
| H | 1.53029  | -1.7084  | 1.45319  |

|   |          |          |          |
|---|----------|----------|----------|
| H | 1.3911   | 0.03524  | 1.44877  |
| C | 3.0789   | -0.70005 | 0.36761  |
| C | 3.42527  | -0.08681 | -0.83668 |
| C | 4.10605  | -1.18231 | 1.18293  |
| C | 4.76149  | 0.04708  | -1.20787 |
| C | 5.4391   | -1.04121 | 0.81205  |
| H | 3.86131  | -1.68107 | 2.11711  |
| C | 5.79296  | -0.4202  | -0.39032 |
| H | 6.21763  | -1.42996 | 1.46255  |
| C | -1.23095 | 0.70903  | 0.11089  |
| C | -0.3486  | 1.67683  | 0.91109  |
| C | -1.4685  | 1.30721  | -1.30544 |
| C | -0.9068  | 3.1029   | 0.95365  |
| H | 0.63718  | 1.71391  | 0.43665  |
| H | -0.22572 | 1.29861  | 1.93095  |
| C | -2.03951 | 2.72272  | -1.25702 |
| H | -0.50778 | 1.3101   | -1.83345 |
| H | -2.13832 | 0.64442  | -1.86209 |
| H | -0.2057  | 3.73848  | 1.50442  |
| H | -1.84271 | 3.13544  | 1.52791  |
| H | -2.1658  | 3.09819  | -2.27773 |
| H | -3.04574 | 2.69994  | -0.81815 |
| H | 2.63786  | 0.27459  | -1.48975 |
| C | -1.14634 | 3.65934  | -0.44748 |
| H | -1.58794 | 4.65979  | -0.38969 |
| H | -0.18165 | 3.77123  | -0.96004 |
| H | 5.00497  | 0.5213   | -2.15465 |
| C | 7.23613  | -0.24928 | -0.77873 |
| H | 7.66806  | 0.63894  | -0.30494 |
| H | 7.83779  | -1.10774 | -0.46927 |
| H | 7.34716  | -0.13103 | -1.85905 |
| C | -3.4397  | -0.47124 | 4.54171  |
| H | -4.33442 | -1.03682 | 4.79986  |
| H | -3.04701 | 0.05935  | 5.40962  |
| H | -2.67788 | -1.11911 | 4.10709  |
| O | -3.86221 | 0.48715  | 3.55488  |
| O | -2.8641  | 1.23526  | 3.16089  |

[Liproxstatin-6]

transition state (1'-NH)

|   |          |          |          |
|---|----------|----------|----------|
| C | 2.93184  | 2.55222  | 0.40971  |
| C | 1.77967  | 3.33454  | -0.18893 |
| C | 0.65235  | 1.26847  | -0.36191 |
| N | 3.07052  | 1.32588  | -0.35777 |
| H | 4.14533  | 0.70859  | -0.03818 |
| N | 0.57877  | 2.54668  | -0.35859 |
| N | -0.52197 | 0.55228  | -0.41545 |
| H | -0.4813  | -0.3854  | -0.77829 |
| C | -1.7816  | 1.2477   | -0.59142 |
| H | -1.80591 | 1.7897   | -1.54575 |
| H | -1.85781 | 2.0049   | 0.19298  |
| C | -2.93082 | 0.2783   | -0.52877 |
| C | -3.40137 | -0.26431 | 0.67403  |
| C | -3.57035 | -0.12574 | -1.70531 |
| C | -4.45868 | -1.16928 | 0.70529  |
| C | -4.62783 | -1.03034 | -1.69408 |
| H | -3.22551 | 0.29029  | -2.64739 |
| C | -5.07151 | -1.55401 | -0.48342 |
| H | -5.10346 | -1.32059 | -2.62446 |
| H | -5.8962  | -2.25805 | -0.45699 |
| C | 1.92641  | 0.41876  | -0.24205 |
| C | 1.90217  | -0.36257 | 1.09774  |
| C | 2.02924  | -0.59232 | -1.40439 |
| C | 3.08498  | -1.32035 | 1.24015  |
| H | 0.96648  | -0.92803 | 1.1633   |
| H | 1.88378  | 0.34647  | 1.93175  |
| C | 3.22925  | -1.5273  | -1.25532 |
| H | 1.12974  | -1.21909 | -1.44331 |
| H | 2.08463  | -0.03572 | -2.34419 |
| H | 2.99028  | -1.87439 | 2.18106  |
| H | 4.02609  | -0.75717 | 1.32465  |
| H | 3.24615  | -2.22981 | -2.09643 |
| H | 4.16491  | -0.95635 | -1.32618 |
| C | 3.19561  | -2.29823 | 0.06694  |

|    |          |          |          |
|----|----------|----------|----------|
| H  | 2.28403  | -2.91564 | 0.06543  |
| C  | 4.39724  | -3.22568 | 0.2131   |
| H  | 4.35078  | -3.79407 | 1.14701  |
| H  | 4.45006  | -3.94182 | -0.61265 |
| H  | 5.33283  | -2.65539 | 0.21766  |
| H  | -4.79633 | -1.56197 | 1.65718  |
| Cl | -2.676   | 0.19892  | 2.18975  |
| H  | 3.86316  | 3.1208   | 0.33112  |
| H  | 2.74129  | 2.37804  | 1.48328  |
| H  | 2.07684  | 3.73319  | -1.16769 |
| H  | 1.53672  | 4.19724  | 0.44196  |
| C  | 7.48923  | 0.21154  | 0.32181  |
| H  | 8.26743  | 0.97406  | 0.3218   |
| H  | 7.54448  | -0.40534 | -0.57563 |
| H  | 7.54448  | -0.40534 | 1.21925  |
| O  | 6.24413  | 0.93306  | 0.32181  |
| O  | 5.22181  | 0.11698  | 0.32181  |
